# Supplementary material for: Genomic and Experimental Analysis of the Biostimulant and Antagonistic Properties of Phytopathogens of Bacillus safensis and Bacillus siamensis
Source: MDPI journal article supplement (doi:10.3390/microorganisms10040670), 2022-03-22
Supplement: s1 [file s1]

**Table S2.** Reference genes and proteins involved in plant growth promotion factors.

| Type of Factor                         | Factor                     | Gen Name    | Function                                                  | Protein Accession N° | Reference |
|----------------------------------------|----------------------------|-------------|-----------------------------------------------------------|----------------------|-----------|
| Phytohormones biosynthesis             | Indol-3-acetic acid        | <i>trpE</i> | anthranilate synthase                                     | CAL26225.1           | [1]       |
|                                        |                            | <i>trpD</i> | anthranilate phosphoribosyltransferase                    | CAL26226.1           |           |
|                                        |                            | <i>trpC</i> | indole-3-glycerol-phosphate synthase                      | WP_012117859.1       |           |
|                                        |                            | <i>trpF</i> | N-(5'-phosphoribosyl)anthranilate isomerase               | WP_012117858.1       |           |
|                                        |                            | <i>trpB</i> | tryptophan synthase subunit beta                          | WP_012117857.1       |           |
|                                        |                            | <i>trpA</i> | tryptophan synthase subunit alpha                         | WP_012117856.1       |           |
|                                        |                            | <i>ysnE</i> | Putative IAA-acetyl-transferase                           | WP_012118742.1       |           |
|                                        | Cytokinin                  | <i>yhcX</i> | Nitrilase                                                 | CAL26199.1           | [2]       |
|                                        |                            | <i>miaA</i> | tRNA dimethylallyltransferase                             | NP_389615            |           |
|                                        |                            | <i>miaB</i> | tRNA-2-methylthio-N(6)-dimethylallyladenosine synthase    | NP_389583            |           |
|                                        |                            | <i>yvdD</i> | cytokinin riboside 5'-monofosfato fosforibohidrolase      | NP_391344.1          |           |
| Polyamines biosynthesis                | Putrescine                 | <i>speA</i> | Arginine decarboxylase                                    | NP_389346.1          | [2]       |
|                                        |                            | <i>speB</i> | Agmatinase                                                | NP_391629.1          |           |
|                                        | Spermidine                 | <i>speD</i> | S-adenosylmethionine decarboxylase                        | NP_390779.2          |           |
|                                        |                            | <i>speE</i> | Polyamine aminopropyltransferase                          | NP_391630.1          |           |
| Plant growth promotor volatil compound | Acetoin and 2,3-butanediol | <i>alsS</i> | Acetolactate synthase                                     | ILVX_BACSU           | [3]       |
|                                        |                            | <i>alsD</i> | Alpha-acetolactate decarboxylase                          | ALDC_BACSU           |           |
|                                        |                            | <i>bdhA</i> | (R,R)-butanediol dehydrogenase                            | BDHA_BACSU           |           |
|                                        |                            | <i>alsR</i> | HTH-type transcriptional regulator AlsR                   | ALSR_BACSU           |           |
|                                        | Acetoin and 2,3-butanediol | <i>acuA</i> | Acetoin utilization protein AcuA                          | ACUA_BACSU           |           |
|                                        |                            | <i>acuB</i> | Acetoin utilization protein AcuB                          | ACUB_BACSU           |           |
|                                        |                            | <i>acuC</i> | Acetoin utilization protein AcuC                          | ACUC_BACSU           |           |
|                                        |                            | <i>acoA</i> | 2,6-dichlorophenolindophenol oxidoreductase subunit alpha | ACOA_BACSU           |           |
|                                        |                            | <i>acoB</i> | 2,6-dichlorophenolindophenol oxidoreductase subunit beta  | ACOB_BACSU           |           |
|                                        |                            | <i>acoC</i> | Acetoin dehydrogenase E2 component                        | ACOC_BACSU           |           |

|                          |             |                                                                   |            |     |
|--------------------------|-------------|-------------------------------------------------------------------|------------|-----|
| GABA                     | <i>bdhA</i> | (R,R)-butanediol dehydrogenase                                    | BDHA_BACSU | [4] |
|                          | <i>gadP</i> | GABA permease                                                     | BSU06310   |     |
|                          | <i>gadD</i> | Succinate-semialdehyde dehydrogenase                              | BSU03910   |     |
|                          | <i>gadT</i> | 4-aminobutyrate aminotransferase                                  | BSU03900   |     |
| Phosphate solubilization | <i>phoR</i> | Alkaline phosphatase synthesis                                    | PHOR_BACSU | [5] |
|                          | <i>phoP</i> | Alkaline phosphatase synthesis transcriptional regulatory protein | PHOP_BACSU |     |
|                          | <i>phoA</i> | Alkaline phosphatase                                              | PPB4_BACSU |     |
|                          | <i>gdh</i>  | Glucose 1-dehydrogenase                                           | DHG_BACSU  |     |
|                          | <i>yvcT</i> | 2-ketogluconate reductase                                         | TKRA_BACSU |     |
|                          |             |                                                                   |            |     |
| Nitrogen metabolims      | <i>ureA</i> | Urea amidohydrolase subunit gamma                                 | URE3_BACSU | [6] |
|                          | <i>ureB</i> | Urease subunit beta                                               | URE2_BACSU |     |
|                          | <i>ureC</i> | Urease subunit alpha                                              | URE1_BACSU |     |
|                          | <i>nasD</i> | Nitrite reductase                                                 | NASD_BACSU |     |
|                          | <i>nasE</i> | Assimilatory nitrite reductase [NAD(P)H] small subunit            | NASE_BACSU |     |
|                          | <i>narG</i> | Nitrate reductase alpha chain                                     | NARG_BACSU |     |
|                          | <i>narI</i> | Nitrate reductase gamma chain                                     | NARI_BACSU |     |
|                          | <i>narH</i> | Nitrate reductase beta chain                                      | NARH_BACSU |     |

## References

1. Idris, E.E.; Iglesias, D.J.; Talon, M.; Borriss, R. Tryptophan-Dependent Production of Indole-3-Acetic Acid (IAA) Affects Level of Plant Growth Promotion by *Bacillus amyloliquefaciens* FZB42. *Mol. Plant-Microbe Interact.* **2007**, *20*, 619–626. <https://doi.org/10.1094/mpmi-20-6-0619>.
2. Borriss, R.; Danchin, A.; Harwood, C.R.; Médigue, C.; Rocha, E.P.; Sekowska, A.; Vallenet, D. *Bacillus subtilis*, the model Gram-positive bacterium: 20 years of annotation refinement. *Microb. Biotechnol.* **2017**, *11*, 3–17. <https://doi.org/10.1111/1751-7915.13043>.
3. Ryu, C.-M.; Farag, M.A.; Hu, C.-H.; Reddy, M.S.; Wei, H.-X.; Paré, P.W.; Kloepper, J.W. Bacterial volatiles promote growth in *Arabidopsis*. *Proc. Natl. Acad. Sci. USA* **2003**, *100*, 4927–4932. <https://doi.org/10.1073/pnas.0730845100>.
4. Belitsky, B.R.; Sonenshein, A.L. GabR, a member of a novel protein family, regulates the utilization of gamma-aminobutyrate in *Bacillus subtilis*. *Mol. Microbiol.* **2002**, *45*, 569–583. <https://doi.org/10.1046/j.1365-2958.2002.03036.x>.
5. Hulett, F.M.; Kim, E.E.; Bookstein, C.; Kapp, N.V.; Edwards, C.W.; Wyckoff, H.W. *Bacillus subtilis* alkaline phosphatases III and IV. Cloning, sequencing, and comparisons of deduced amino acid sequence with *Escherichia coli* alkaline phosphatase three-dimensional structure. *J. Biol. Chem.* **1991**, *266*, 1077–1084.
6. Kim, J.K.; Mulrooney, S.B.; Hausinger, R.P. Biosynthesis of Active *Bacillus subtilis* Urease in the Absence of Known Urease Accessory Proteins. *J. Bacteriol.* **2005**, *187*, 7150–7154. <https://doi.org/10.1128/jb.187.20.7150-7154.2005>.
