# Supplementary material for: Genomic and Experimental Analysis of the Biostimulant and Antagonistic Properties of Phytopathogens of Bacillus safensis and Bacillus siamensis
Source: MDPI journal article supplement (doi:10.3390/microorganisms10040670), 2022-03-22
Supplement: s1 [file s1]

**Table S3.** Bacterial strains used in genomic comparative analysis.

| Strains                                  | Accession Number Genebank | Ref.       |
|------------------------------------------|---------------------------|------------|
| <i>Bacillus safensis</i> RGM 2450        | JAQVU000000000            | This study |
| <i>Bacillus siamensis</i> RGM 2529       | JAQVT000000000            | This study |
| <i>Bacillus altitudinis</i> 41KF2b       | NZ_ASJC00000000.1         | [1]        |
| <i>Bacillus amyloliquefaciens</i> DSM7   | NC_014551.1               | [2]        |
| <i>Bacillus licheniformis</i> ATCC 14580 | CP000002.3                | [3]        |
| <i>Bacillus pumilus</i> SF4              | CP047089.1                | [4]        |
| <i>Bacillus safensis</i> FO-36b          | CP010405.1                | [5]        |
| <i>Bacillus siamensis</i> KCTC 13613     | NZ_AJVF00000000.1         | [6]        |
| <i>Bacillus subtilis</i> 168             | NC_000964.3               | [7]        |
| <i>Bacillus subtilis</i> fmb60           | LYMC00000000.1            | [8]        |
| <i>Bacillus velezensis</i> FZB42         | NC_009725.2               | [9]        |
| <i>Bacillus velezensis</i> QST713        | NZ_CP025079.1             | [10]       |

## References

- Shivaji, S.; Chaturvedi, P.; Suresh, K.; Reddy, G.S.N.; Dutt, C.B.S.; Wainwright, M.; Narlikar, J.V.; Bhargava, P.M. *Bacillus aerius* sp. nov., *Bacillus aerophilus* sp. nov., *Bacillus stratosphericus* sp. nov. and *Bacillus altitudinis* sp. nov., isolated from cryogenic tubes used for collecting air samples from high altitudes. *Int. J. Syst. Evol. Microbiol.* **2006**, *56*, 1465–1473. <https://doi.org/10.1099/ijs.0.64029-0>.
- Rückert, C.; Blom, J.; Chen, X.; Reva, O.; Borriss, R. Genome sequence of *B. amyloliquefaciens* type strain DSM7T reveals differences to plant-associated *B. amyloliquefaciens* FZB42. *J. Biotechnol.* **2011**, *155*, 78–85. <https://doi.org/10.1016/j.jbiotec.2011.01.006>.
- Rey, M.W.; Ramaiya, P.; A Nelson, B.; Brody-Karpin, S.D.; Zaretsky, E.J.; Tang, M.; De Leon, A.L.; Xiang, H.; Gusti, V.; Clausen, I.G.; et al. Complete genome sequence of the industrial bacterium *Bacillus licheniformis* and comparisons with closely related *Bacillus* species. *Genome Biol.* **2004**, *5*, r77–r77. <https://doi.org/10.1186/gb-2004-5-10-r77>.
- Iqbal, S.; Vollmers, J.; Janjua, H. Genome Mining and Comparative Genome Analysis Revealed Niche-Specific Genome Expansion in Antibacterial *Bacillus pumilus* Strain SF-4. *Genes* **2021**, *12*, 1060. <https://doi.org/10.3390/genes12071060>.
- Tirumalai, M.R.; Stepanov, V.G.; Wünsche, A.; Montazari, S.; Gonzalez, R.O.; Venkateswaran, K.; Fox, G.E. *Bacillus safensis* FO-36b and *Bacillus pumilus* SAFR-032: A whole genome comparison of two spacecraft assembly facility isolates. *BMC Microbiol.* **2018**, *18*, 1–16. <https://doi.org/10.1186/s12866-018-1191-y>.
- Jeong, H.; Jeong, D.-E.; Kim, S.H.; Song, G.C.; Park, S.-Y.; Ryu, C.-M.; Park, S.-H.; Choi, S.-K. Draft Genome Sequence of the Plant Growth-Promoting Bacterium *Bacillus siamensis* KCTC 13613 T. *J. Bacteriol.* **2012**, *194*, 4148–4149. <https://doi.org/10.1128/jb.00805-12>.
- Borriss, R.; Danchin, A.; Harwood, C.R.; Médigue, C.; Rocha, E.P.; Sekowska, A.; Vallenet, D. *Bacillus subtilis*, the model Gram-positive bacterium: 20 years of annotation refinement. *Microb. Biotechnol.* **2017**, *11*, 3–17. <https://doi.org/10.1111/1751-7915.13043>.
- Yang, J.; Zhu, X.; Cao, M.; Wang, C.; Zhang, C.; Lu, Z.; Lu, F. Genomics-Inspired Discovery of Three Antibacterial Active Metabolites, Aurantinins B, C, and D from Compost-Associated *Bacillus subtilis* fmb60. *J. Agric. Food Chem.* **2016**, *64*, 8811–8820. <https://doi.org/10.1021/acs.jafc.6b04455>.
- Fan, B.; Wang, C.; Song, X.; Ding, X.; Wu, L.; Wu, H.; Gao, X.; Borriss, R. *Bacillus velezensis* FZB42 in 2018: The Gram-Positive Model Strain for Plant Growth Promotion and Biocontrol. *Front. Microbiol.* **2018**, *9*, 2491. <https://doi.org/10.3389/fmicb.2018.02491>.
- Pandin, C.; Le Coq, D.; Deschamps, J.; Védie, R.; Rousseau, T.; Aymerich, S.; Briandet, R. Complete genome sequence of *Bacillus velezensis* QST713: A biocontrol agent that protects *Agaricus bisporus* crops against the green mould disease. *J. Biotechnol.* **2018**, *20*, 10–19. <https://doi.org/10.1016/j.jbiotec.2018.04.014>.
