# Supplementary material for: Genomic and Experimental Analysis of the Biostimulant and Antagonistic Properties of Phytopathogens of Bacillus safensis and Bacillus siamensis
Source: MDPI journal article supplement (doi:10.3390/microorganisms10040670), 2022-03-22
Supplement: s1 [file s1]

**Table S6.** Comparative analysis of gene clusters involved in plant growth promotor factors of *B. siamensis* RGM 2529.

| Type Factor                            | Factor                     | Location    | Cluster Position         | Identity                        |    |
|----------------------------------------|----------------------------|-------------|--------------------------|---------------------------------|----|
|                                        |                            |             |                          | PGPR Strain                     | %  |
| Secondary metabolites                  | Bacillibactin              | Scaffold 6  | 895012-878233            | <i>B. velezensis</i> QST 713    | 92 |
|                                        | Surfactin                  | Scaffold 6  | 2-15407<br>227358-247054 | <i>B. velezensis</i> QST 713    | 93 |
|                                        | Fengycin                   | Scaffold 8  | 874448-923913            | <i>B. velezensis</i> QST 713    | 92 |
|                                        | Bacillaene                 | Scaffold 8  | 1061005-1133351          | <i>B. velezensis</i> QST 713    | 92 |
|                                        | Aurantinin                 | Contig 419  | 2-22820                  | <i>B. subtilis</i> fmb60        | 97 |
|                                        |                            | Contig 471  | 1380-13853               |                                 | 92 |
|                                        |                            | Scaffold 4  | 1-7960                   |                                 | 86 |
|                                        |                            | Scaffold 9  | 9725-23086               |                                 | 86 |
|                                        | Bacillomycin D             | Scaffold 8  | 932676-977313            | <i>B. velezensis</i> QST 714    | 77 |
|                                        | Amylocyclin                | Scaffold 6  | 866517-870687            | <i>B. velezensis</i> QST 715    | 93 |
| Phytohormon byosisnthesis              | Indol-3-acetic acid        | Scaffold 8  | 667442-661531            | <i>B. velezensis</i> FZB421     | 93 |
|                                        |                            | Scaffold 6  | 279225-279683            |                                 |    |
|                                        |                            | Contig 471  | 64800-66338              |                                 |    |
|                                        | Cytokinin                  | Scaffold 8  | 1052977-1053921          | <i>Priestia megaterium</i> STB1 | 67 |
|                                        |                            | Scaffold 8  | 1140820-1142349          |                                 |    |
|                                        |                            | Scaffold 6  | 606838-607413            |                                 |    |
| Polyamines                             | Putrescine                 | Scaffold 3  | 132047-135232            | <i>Priestia megaterium</i> STB1 | 79 |
|                                        |                            | Scaffold 8  | 1385796-1387268          |                                 |    |
|                                        | Spermidin                  | Scaffold 6  | 343797-344669            | <i>Priestia megaterium</i> STB1 | 84 |
|                                        |                            | Scaffold 8  | 169859-170239            |                                 |    |
| Plant growth promotor volatil compound | Acetoin and butanediol     | Scaffold 6  | 342908-343738            | <i>B. subtilis</i> 168          | 80 |
|                                        |                            | Scaffold 6  | 460390-463993            |                                 |    |
| Phytohormon catabolism                 | GABA                       | Scaffold 3  | 217726-218766            | <i>B. subtilis</i> 168          | 87 |
|                                        |                            | Scaffold 7  | 187922-218766            |                                 |    |
|                                        | Acetoin and 2,3-butanediol | Scaffold 3  | 212141-213526            | <i>B. subtilis</i> 168          | 81 |
|                                        |                            | Scaffold 8  | 92563-94395              |                                 |    |
| Phosphate solubilization               | Alkaline phophatase        | Scaffold 3  | 49196-52437              | <i>B. subtilis</i> 168          | 79 |
|                                        |                            | Scaffold 8  | 158106-160557            |                                 |    |
|                                        |                            | Conting 471 | 83307-84686              |                                 |    |
|                                        | Phytase                    | Conting 463 | 79826-81577              | <i>B. subtilis</i> 168          | 71 |
|                                        |                            | Scaffold 8  | 770352-771503            |                                 |    |
|                                        |                            | Scaffold 7  | 186096-186881            |                                 |    |
| Nitrogen metabolims                    | organic acid               | Scaffold 6  | 602817-603782            | <i>B. subtilis</i> 168          | 85 |
|                                        |                            | Scaffold 6  | 413884-416278            |                                 |    |
|                                        | Urease                     | Scaffold 6  | 413884-416278            |                                 | 88 |
|                                        | Nitrite reductase          | Contig 463  | 15804-18562              |                                 | 93 |
|                                        | Nitrate reductase          | Scaffold 6  | 355515-361905            |                                 | 96 |
