# Supplementary material for: Genomic and Experimental Analysis of the Biostimulant and Antagonistic Properties of Phytopathogens of Bacillus safensis and Bacillus siamensis
Source: MDPI journal article supplement (doi:10.3390/microorganisms10040670), 2022-03-22
Supplement: s1 [file s1]

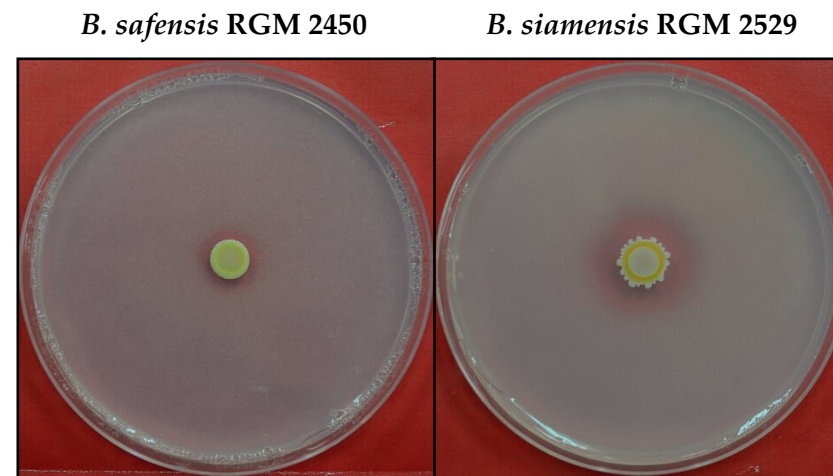

**Figure S4.** Evaluation of the ability of *B. safensis* RGM 2450 and *B. siamensis* RGM 2529 to solubilize inorganic phosphorus.
