# Supplementary material for: Genomic and Experimental Analysis of the Biostimulant and Antagonistic Properties of Phytopathogens of Bacillus safensis and Bacillus siamensis
Source: MDPI journal article supplement (doi:10.3390/microorganisms10040670), 2022-03-22
Supplement: s1 [file s1]

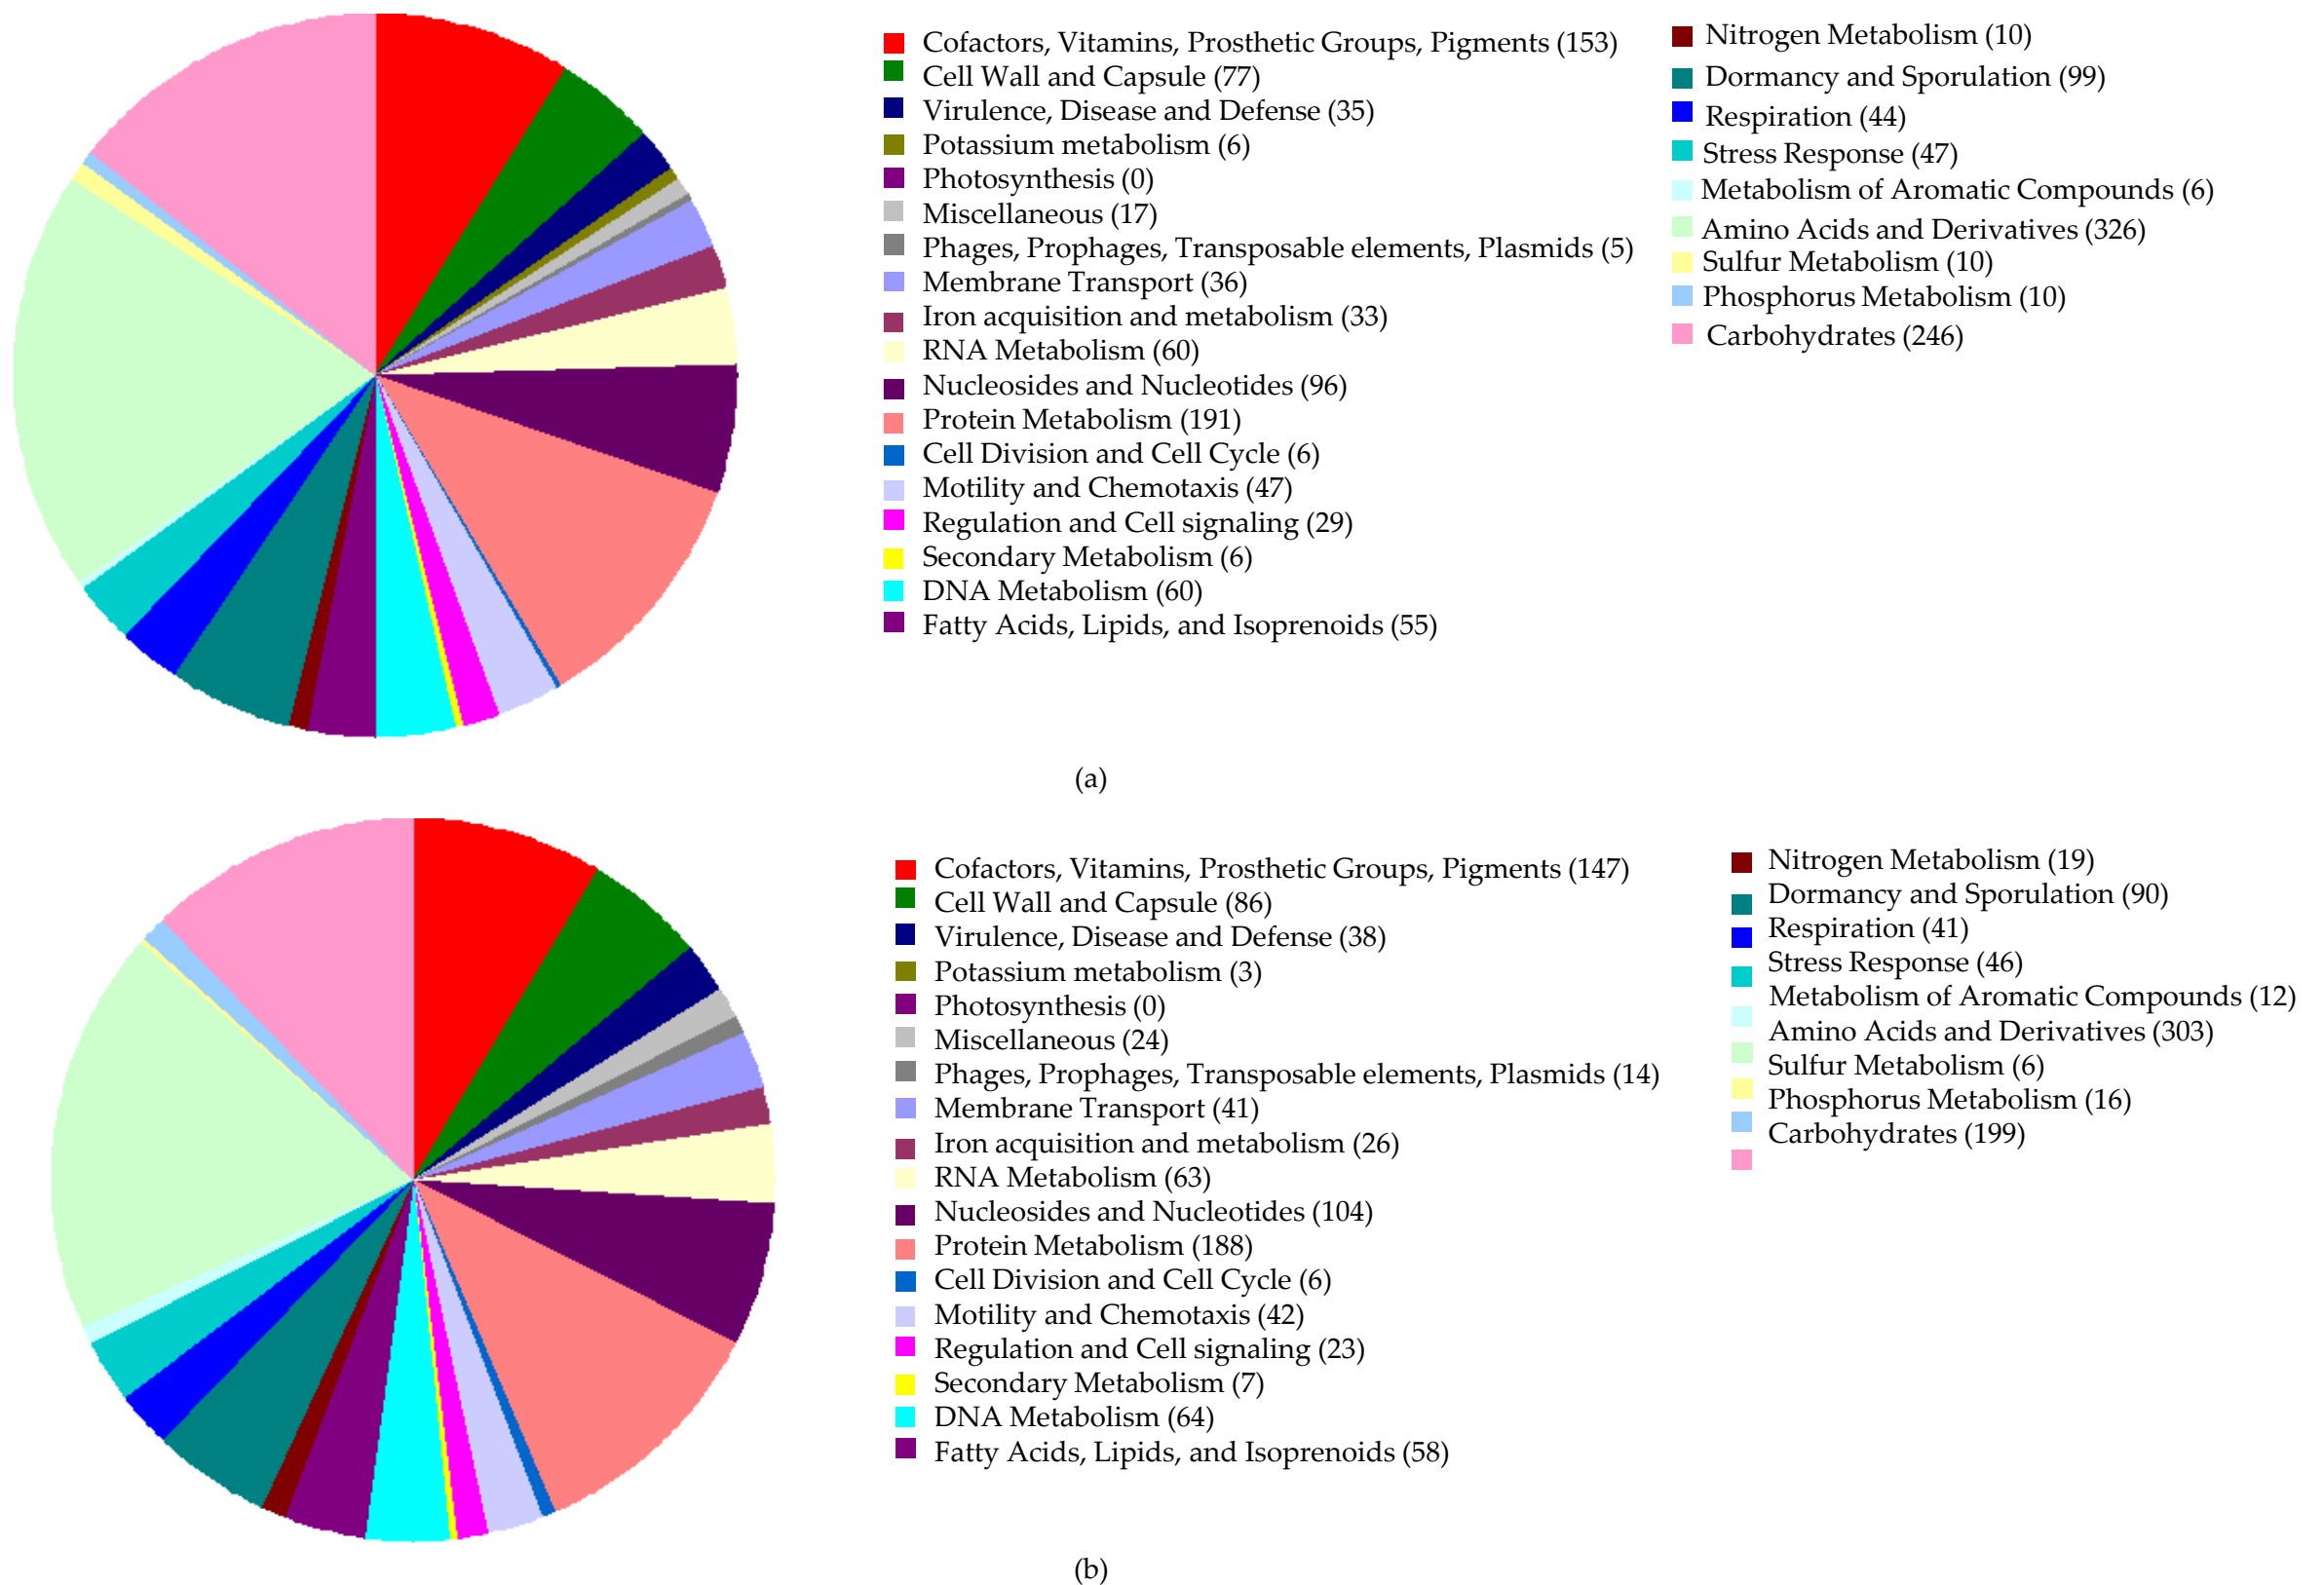

**Figure S1.** Classification of predicted proteins from *B. safensis* RGM 2450 and *B. siamensis* RGM 2529 according to COG. **(a)** strain RGM 2450. **(b)** strain RGM 2529.
