# Supplementary material for: Genomic and Experimental Analysis of the Biostimulant and Antagonistic Properties of Phytopathogens of Bacillus safensis and Bacillus siamensis
Source: MDPI journal article supplement (doi:10.3390/microorganisms10040670), 2022-03-22
Supplement: s1 [file s1]

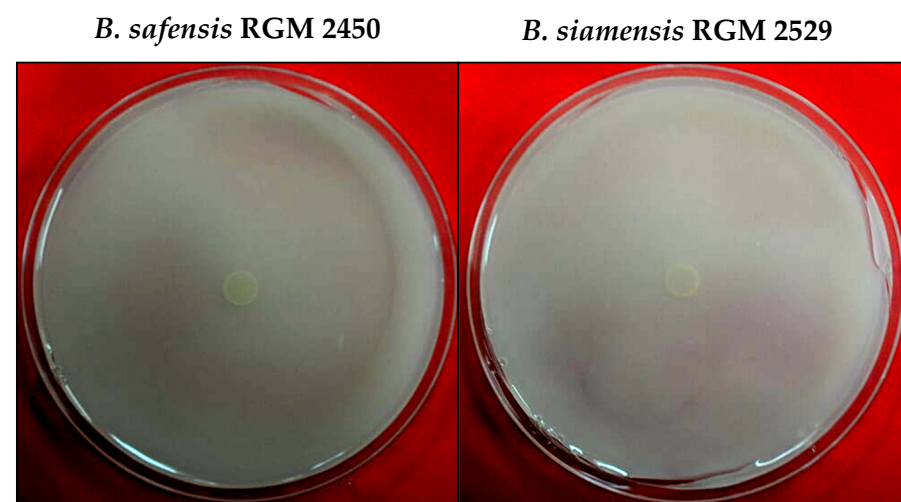

(a)

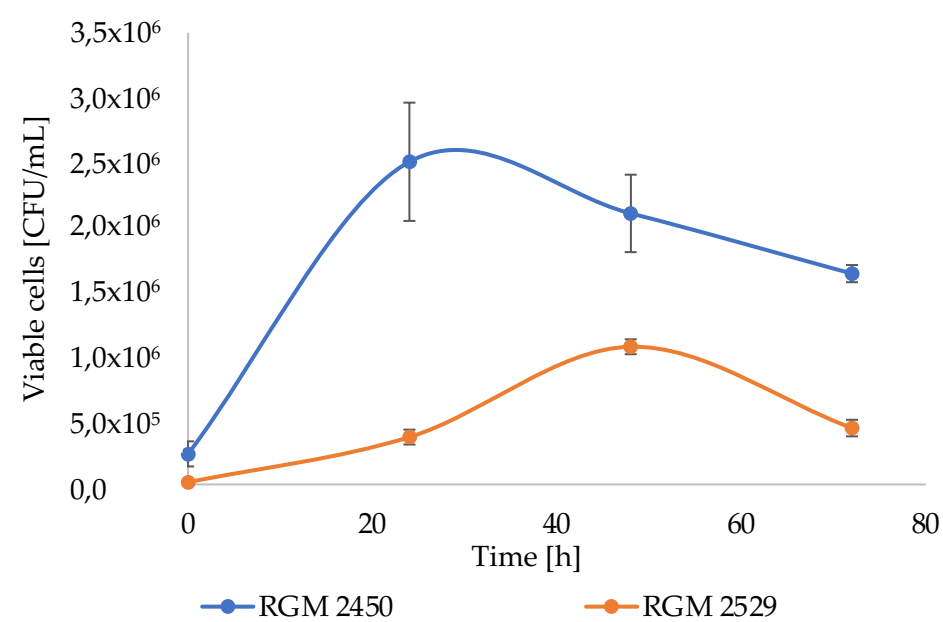

(b)

| Viable cells (CFU/mL) |                                       |                                       |
|-----------------------|---------------------------------------|---------------------------------------|
| Time (h)              | RGM 2450                              | RGM 2529                              |
| 0                     | $2,4 \times 10^5 \pm 9,7 \times 10^4$ | $1,7 \times 10^4 \pm 4,0 \times 10^3$ |
| 24                    | $2,5 \times 10^6 \pm 4,6 \times 10^5$ | $3,7 \times 10^5 \pm 5,8 \times 10^4$ |
| 48                    | $2,1 \times 10^6 \pm 3,0 \times 10^5$ | $1,1 \times 10^6 \pm 5,8 \times 10^4$ |
| 72                    | $1,6 \times 10^6 \pm 6,7 \times 10^4$ | $4,4 \times 10^5 \pm 6,4 \times 10^4$ |

(c)

**Figure S3.** Evaluation of growth in *B. safensis* RGM 2450 and *B. siamensis* RGM 2529 strains in Ashby medium. (a) Growth of RGM 2450 and RGM 2529 strains in Ashby agar medium. (b) growth curve for RGM 2450 and RGM 2529 strains in Ashby medium. (c) Number of viable cells of RGM 2450 and RGM 2529 strains during incubation in Ashby medium.
