# Supplementary material for: Genomic and Experimental Analysis of the Biostimulant and Antagonistic Properties of Phytopathogens of Bacillus safensis and Bacillus siamensis
Source: MDPI journal article supplement (doi:10.3390/microorganisms10040670), 2022-03-22
Supplement: s1 [file s1]

**Table S8.** Extracellular enzymes encoded from *B. siamensis* RGM 2529 genome.

| Type Factor                    | Factor                                                                | Location   | Cluster Position | Identity (%)* |
|--------------------------------|-----------------------------------------------------------------------|------------|------------------|---------------|
| Proteases                      | Minor extracellular protease Vpr                                      | Scaffold 6 | 286144-288555    | 98            |
|                                | Gamma-glutamyltranspeptidase                                          | Scaffold 6 | 452401-453978    | 94            |
|                                | Gamma-glutamyltranspeptidase                                          | Scaffold 8 | 867610-869385    | 99            |
|                                | D-alanyl-D-alanine carboxypeptidase                                   | Scaffold 8 | 874448-875920    | 93            |
|                                | Serine protease AprX                                                  | Scaffold 8 | 1057549-1058877  | 95            |
|                                | Subtilisin E                                                          | Contig 471 | 167972-169120    | 98            |
|                                | Bacillopeptidase F precursor                                          | Scaffold 8 | 1323563-1327852  | 94            |
|                                | Bacillolysin, extracellular neutral metalloprotease                   | Scaffold 8 | 1381280-1382845  | 97            |
| Lipase                         | Lipase precursor                                                      | Contig 463 | 72775-73419      | 97            |
| Plant wall degradation enzymes | Endo-1,4-beta-xylanase                                                | Scaffold 6 | 417111-417752    | 94            |
|                                | Glucuronoarabinoxylan endo-1,4-beta-xylanase                          | Scaffold 8 | 976045-977313    | 94            |
|                                | Pectate lyase precursor                                               | Scaffold 3 | 106362-107627    | 96            |
| Cell-wall glycopeptides        | N-acetylmuramoyl-L-alanine amidase                                    | Scaffold 6 | 995789-996793    | 73            |
|                                | N-acetylmuramoyl-L-alanine amidase                                    | Scaffold 7 | 143741-143881    | 75            |
|                                | N-acetylmuramoyl-L-alanine amidase                                    | Scaffold 8 | 1560706-1561584  | 96            |
|                                | N-acetylmuramoyl-L-alanine amidase                                    | Scaffold 9 | 3579-4762        | 33            |
|                                | Alpha-amylase                                                         | Contig 463 | 40924-42903      | 96            |
|                                | beta-1,4-glucanase (cellulase)                                        | Scaffold 8 | 980228-981727    | 93            |
|                                | Soluble lytic murein transglycosylase                                 | Contig 471 | 270137-270823    | 90            |
| Polisaccharide hydrolase       | Levansucrase (EC 2.4.1.10)                                            | Scaffold 6 | 56770-58191      | 98            |
|                                | 6-phospho-beta-glucosidase (EC 3.2.1.86)                              | Scaffold 6 | 183705-183833    | 100           |
|                                | Mannosyl-glycoprotein endo-beta-N-acetylglucosaminidase (EC 3.2.1.96) | Scaffold 6 | 499196-501835    | 58            |
|                                | Chitosanase precursor (EC 3.2.1.132)                                  | Scaffold 6 | 807184-808020    | 99            |
|                                | Arabinan endo-1,5-alpha-L-arabinosidase (EC 3.2.1.99)                 | Scaffold 8 | 185621-185767    | 70            |
|                                | Endo-beta-1,3-1,4 glucanase (licheninase) (EC 3.2.1.73)               | Scaffold 6 | 203049-203780    | 95            |
|                                | Arabinoxylan arabinofuranohydrolase (EC 3.2.1.55)                     | Scaffold 8 | 974613-97566     | 91            |
|                                | Ribonuclease (Barnase), secreted                                      | Scaffold 6 | 602222-602671    | 95            |
| Ribonuclease                   | Extracellular ribonuclease Bsn                                        | Scaffold 6 | 825907-826773    | 78            |
| Fe metabolism                  | Ferredoxin reductase                                                  | Scaffold 6 | 907396-907566    | 36            |
|                                | Ferrous iron transport peroxidase EfeB                                | Scaffold 6 | 266069-267325    | 95            |
| Lactamase                      | Class A beta-lactamase (EC 3.5.2.6)                                   | Contig 471 | 307694-308608    | 94            |
| Phytasa                        | 3-phytase (EC 3.1.3.8)                                                | Scaffold 8 | 770352-771503    | 95            |
| Oxidative stress               | Superoxide dismutase [Mn] (EC 1.15.1.1)                               | Scaffold 8 | 462539-463144    | 99            |

\* Identity of the genes regarding to *Bacillus velezensis* strain FZB42. NI, no identity.
