# Supplementary material for: Genomic and Experimental Analysis of the Biostimulant and Antagonistic Properties of Phytopathogens of Bacillus safensis and Bacillus siamensis
Source: MDPI journal article supplement (doi:10.3390/microorganisms10040670), 2022-03-22
Supplement: s1 [file s1]

**Table S4.** Genome features.

| Attribute                         | <i>B. safensis</i> RGM 2450 |       | <i>B. siamensis</i> RGM 2529 |      |
|-----------------------------------|-----------------------------|-------|------------------------------|------|
|                                   | Value                       | %     | Value                        | %    |
| Genome size (bp)                  | 3,798,090                   | 100   | 3,916,442                    | 100  |
| DNA coding (bp)                   | 3,372,920                   | 89    | 3,492,149                    | 89   |
| DNA G + C (bp)                    | 1,568,611                   | 41.3  | 1,797,647                    | 45.9 |
| Scaffold de DNA                   | 6                           | -     | 11                           | -    |
| N° total de genes                 | 4139                        | 100.0 | 4.331                        | 100  |
| L50                               | 4                           | -     | 9                            | -    |
| Protein coding genes              | 3982                        | 96    | 4.174                        | 96   |
| RNA genes                         | 79                          | 1.9   | 87                           | 2    |
| Genes assigned to COGs            | 1710                        | 41    | 1666                         | 38   |
| Protein with signal peptides      | 373                         | 9.0   | 367                          | 8.4  |
| Protein with extracellular domain | 81                          | 1.9   | 98                           | 2.3  |
