# Supplementary material for: Genomic and Experimental Analysis of the Biostimulant and Antagonistic Properties of Phytopathogens of Bacillus safensis and Bacillus siamensis
Source: MDPI journal article supplement (doi:10.3390/microorganisms10040670), 2022-03-22
Supplement: s1 [file s1]

**Table S1.** Reference genes and proteins involved in the metabolites secondary production.

| Metabolites   | Gen Name     | Name Protein/Function                                                                             | Protein Accession N° | Reference |
|---------------|--------------|---------------------------------------------------------------------------------------------------|----------------------|-----------|
| Bacilysin     | <i>ywfG</i>  | YwfG, aminotransferase                                                                            | RBAM_034880          | [1]       |
|               | <i>bacE</i>  | BacE protein                                                                                      | RBAM_034890          |           |
|               | <i>bacD</i>  | BacD, ligase                                                                                      | RBAM_034900          |           |
|               | <i>bacC</i>  | BacC, alcohol dehydrogenase                                                                       | RBAM_034910          |           |
|               | <i>bacB</i>  | BacB, isomerase                                                                                   | RBAM_034920          |           |
|               | <i>bacA</i>  | BacA, prephenate decarboxylase                                                                    | RBAM_034930          |           |
|               | <i>ywfA</i>  | YwfA protein                                                                                      | RBAM_034940          |           |
| Bacillibactin | <i>ald</i>   | L-alanine dehydrogenase                                                                           | CAB15181.1           | [2,3]     |
|               | <i>yukJ</i>  | Conserved protein of unknown function                                                             | CAB15183.2           |           |
|               | <i>mbtH</i>  | Stimulator of DhbF tyrosine adenylation activity                                                  | CAX52685.1           |           |
|               | <i>dhbF</i>  | DhbF, Siderophore 2,3-dihydroxybenzoate-glycine-threonine trimeric ester bacillibactin synthetase | CAB15186.3           |           |
|               | <i>dhbB</i>  | DhbB, Isochorismatase (siderophore specific)                                                      | CAB15187.1           |           |
|               | <i>dhbE</i>  | DhbE, 2,3-dihydroxybenzoate-AMP ligase                                                            | CAB15188.1           |           |
|               | <i>dhbC</i>  | DhbC, Isochorismate synthase (siderophore-specific)                                               | CAB15189.2           |           |
|               | <i>dhbA</i>  | DhbA, 2,3-dihydro-2,3-dihydroxybenzoate dehydrogenase                                             | CAB15190.2           |           |
|               | <i>besA</i>  | Bacillibactin trilactone hydrolase                                                                | CAB15191.2           |           |
|               | <i>yuiH</i>  | Putative molybdopterin containing enzyme subunit                                                  | CAB15192.1           |           |
|               | <i>bioYB</i> | Putative biotin transporter                                                                       | CAB15193.1           |           |
|               | <i>hisP</i>  | Histidine / basic amino acid transporter                                                          | CAB15194.1           |           |
|               | <i>pepA</i>  | Cytosol aminopeptidase                                                                            | CAB15195.1           |           |
| Lichenysin    | <i>hyuA1</i> | Hydantoinase A                                                                                    | AAU39353.1           | [4]       |
|               | <i>hyuB1</i> | Hydantoinase B                                                                                    | AAU39354.1           |           |
|               | ND           | Putative spermidine/putrescine ABC transporter solute-binding protein                             | AAU39355.1           |           |
|               | ND           | Putative spermidine/putrescine ABC transporter ATP-binding protein                                | AAU39356.1           |           |
|               | ND           | Putative spermidine/putrescine ABC transporter permease                                           | AAU39357.1           |           |
|               |              |                                                                                                   |                      |           |

|                      |              |                                                                   |                |     |
|----------------------|--------------|-------------------------------------------------------------------|----------------|-----|
|                      | ND           | Putative spermidine/putrescine ABC transporter permease           | AAU39358.1     |     |
|                      | <i>lchAA</i> | Lichenysin synthase LchAA                                         | AAU39359.1     |     |
|                      | <i>lchAB</i> | Lichenysin synthase LchAB                                         | AAU39360.1     |     |
|                      | <i>lchAC</i> | Lichenysin synthase LchAC                                         | AAU39361.1     |     |
|                      | <i>lchAD</i> | Lichenysin synthase LchAD                                         | AAU39362.1     |     |
|                      | <i>ycxC</i>  | Putative transporter YcxC                                         | AAU39363.1     |     |
|                      | <i>ycxD</i>  | Putative PLP-dependent transcriptional regulator YcxD             | AAU39364.1     |     |
|                      | <i>sfp</i>   | 4'-phosphopantetheinyl transferase Sfp                            | AAU39365.1     |     |
|                      | ND           | Putative esterase                                                 | AU39366.1      |     |
| Plantazolicin        | <i>pznF</i>  | Class I SAM-dependent methyltransferase                           | WP_034619896.1 | [5] |
|                      | <i>pznK</i>  | CPBP family intramembrane metalloprotease                         | WP_003211749.1 |     |
|                      | <i>pznG</i>  | SagB/ThcOx family dehydrogenase                                   | WP_003211436.1 |     |
|                      | <i>pznH</i>  | Hypothetical protein                                              | WP_003211025.1 |     |
|                      | <i>pznI</i>  | TOMM precursor leader peptide-binding protein                     | WP_003210769.1 |     |
|                      | <i>pznA</i>  | Hypothetical protein                                              | WP_003211085.1 |     |
|                      | <i>pznJ</i>  | Plantazolicin family RiPP                                         | WP_003212531.1 |     |
|                      | <i>pznC</i>  | Pentapeptide repeat-containing protein                            | WP_003212115.1 |     |
|                      | <i>pznD</i>  | ABC transporter permease                                          | WP_003212220.1 |     |
|                      | <i>pznB</i>  | ABC transporter ATP-binding protein                               | WP_003211121.1 |     |
|                      | <i>pznE</i>  | ArsR family transcriptional regulator                             | WP_034619900.1 |     |
|                      | <i>pznL</i>  | Hypothetical protein                                              | WP_003211448.1 |     |
| Circular bacteriocin | ND           | Uberolysin/carnocyclin family circular bacteriocin                | WP_107162921.1 | ND  |
| Siderophore          | ND           | IucA/IucC family siderophore biosynthesis protein                 | WP_107163851.1 | ND  |
|                      | ND           | IucA/IucC family siderophore biosynthesis protein                 | WP_212040189.1 |     |
|                      | ND           | Lysine N(6)-hydroxylase/L-ornithine N(5)-oxygenase family protein | WP_047202330.1 |     |
| Surfactin            | <i>yciC</i>  | YciC protein                                                      | CAE02619.1     | [6] |
|                      | <i>yx01</i>  | Yx01 protein                                                      | CAE02620.1     |     |
|                      | <i>yckC</i>  | YckC protein                                                      | CAE02621.1     |     |
|                      | <i>yckD</i>  | YckD protein                                                      | CAE02622.1     |     |

|          |              |                                                        |             |
|----------|--------------|--------------------------------------------------------|-------------|
|          | <i>yczE</i>  | YckE protein                                           | CAE02639.1  |
|          | <i>nin</i>   | Nin protein                                            | CAE02624.1  |
|          | <i>nucA</i>  | NucA                                                   | CAE02625.1  |
|          | <i>hxlB</i>  | HxlB, hexuloisomerase                                  | CAE02626.1  |
|          | <i>hxlA</i>  | HxlA, Hexuloisomerase                                  | CAE02627.1  |
|          | <i>hxlR</i>  | HxlR, Transcriptional regulator, HxlR protein          | CAE02628.1  |
|          | <i>xy02</i>  | Xy02 protein                                           | CAE02629.1  |
|          | <i>srfAA</i> | SrfAA, Surfactin synthetase A                          | CAE02630.1  |
|          | <i>srfAB</i> | SrfAB, Surfactin synthetase B                          | CAE02631.1  |
|          | <i>comS</i>  | Competence protein S                                   | CAE02632.1  |
|          | <i>srfAC</i> | SrfAC, Surfactin synthetase C                          | CAE02633.1  |
|          | <i>srfAD</i> | SrfAD, Surfactin synthetase D                          | CAE02634.1  |
|          | <i>aat</i>   | Amino transferase                                      | CAE02635.1  |
|          | <i>ycxc</i>  | Transporter                                            | CAE02636.1  |
|          | <i>sfp</i>   | Phosphopantetheinyl transferase                        | CAE02638.1  |
|          | <i>yczE</i>  | YczE protein                                           | CAE02639.1  |
|          | <i>yckI</i>  | YckI protein                                           | CAE02640.1  |
|          | <i>yckJ</i>  | YckJ protein                                           | CAE02641.1  |
| Fengycin | <i>dacC</i>  | D-alanyl-D-alanine carboxypeptidase                    | RBAM_018470 |
|          | <i>fenB</i>  | FenB, Fengycin synthetase B                            | RBAM_018450 |
|          | <i>fenC</i>  | FenC, Fengycin sintetase C                             | RBAM_018440 |
|          | <i>fenA</i>  | FenA, Fengycin sintetase A                             | RBAM_018460 |
|          | <i>fenD</i>  | FenD, Fengycin sintetase D                             | RBAM_018430 |
|          | <i>fenE</i>  | FenE, Fengycin sintetase E                             | RBAM_018420 |
|          | <i>yngL</i>  | Proteína YngL                                          | RBAM_018410 |
|          | <i>yngK</i>  | Proteína YngK                                          | RBAM_018400 |
|          | <i>yngJ</i>  | Acyl-CoA dehydrogenase                                 | RBAM_018390 |
|          | <i>yngI</i>  | AMP-binding protein                                    | RBAM_018380 |
|          | <i>yngH</i>  | Acetyl-CoA carboxylase biotin carboxylase              | RBAM_018370 |
|          | ND           | Acetyl-CoA carboxylase biotin carboxyl carrier protein | RBAM_018360 |
|          | <i>yngG</i>  | Hydroxymethylglutaryl-CoA lyase                        | RBAM_018350 |

[6]

|            |             |                                                                   |             |     |
|------------|-------------|-------------------------------------------------------------------|-------------|-----|
|            | <i>ynpF</i> | Enoyl-CoA hydratase                                               | RBAM_018340 |     |
|            | <i>ynpE</i> | Acyl-CoA carboxylase subunit beta                                 | RBAM_018330 |     |
|            | <i>baeS</i> | Cytochrome P450 'oxidase'                                         | CAG23962.1  |     |
|            | <i>baeR</i> | Polyketide synthase of type I                                     | CAG23961.2  |     |
|            | <i>baeN</i> | Hybrid NRPS/PKS protein                                           | CAG23960.2  |     |
|            | <i>baeM</i> | Polyketide synthase of type I                                     | CAG23959.2  |     |
|            | <i>baeL</i> | Polyketide synthase of type I                                     | CAG23958.2  |     |
|            | <i>baeJ</i> | Hybrid NRPS/PKS protein                                           | CAG23957.2  |     |
|            | <i>baeI</i> | Polyketide biosynthesis enoyl-CoA hydratase                       | CAG23956.1  |     |
| Bacillaene | <i>baeH</i> | Polyketide biosynthesis enoyl-CoA hydratase                       | CAG23955.1  | [7] |
|            | <i>baeG</i> | 3-hydroxy-3-methylglutaryl CoA synthase                           | CAG23954.2  |     |
|            | <i>acpK</i> | Acyl carrier protein                                              | CAG23953.1  |     |
|            | <i>baeE</i> | Malonyl-CoA-[acyl-carrier protein]<br>transacylase/oxidoreductase | CAG23952.1  |     |
|            | <i>baeD</i> | Malonyl-CoA-[acyl-carrier-protein] transacylase                   | CAG23951.1  |     |
|            | <i>baeC</i> | Malonyl-CoA-[acyl-carrier-protein] transacylase                   | CAG23950.2  |     |
|            | <i>baeB</i> | Hydroxyacylglutathione hydrolase                                  | CAG23949.2  |     |
|            | ND          | Transcription antiterminator                                      | OEI73450.1  |     |
|            | ND          | Hypothetical protein                                              | OEI73451.1  |     |
|            | ND          | Hypothetical protein                                              | OEI73452.1  |     |
|            | ND          | Ubiquinone biosynthesis methyltransferase UbiE                    | OEI73453.1  |     |
|            | ND          | Hypothetical protein                                              | OEI73454.1  |     |
|            | ND          | S-malonyltransferase                                              | OEI73455.1  |     |
|            | ND          | Poly(3-hydroxyalkanoate) depolymerase                             | OEI73456.1  |     |
| Aurantinin | ND          | Polyketide biosynthesis protein                                   | OEI73457.1  | [8] |
|            | ND          | Alpha/beta hydrolase                                              | OEI73458.1  |     |
|            | ND          | Hypothetical protein                                              | OEI73459.1  |     |
|            | ND          | Hypothetical protein                                              | OEI73460.1  |     |
|            | ND          | Hypothetical protein                                              | OEI73461.1  |     |
|            | ND          | Hypothetical protein                                              | OEI73462.1  |     |
|            | ND          | Hypothetical protein                                              | OEI73463.1  |     |

|                     |             |                                                                     |                |     |
|---------------------|-------------|---------------------------------------------------------------------|----------------|-----|
|                     | ND          | Hypothetical protein                                                | OEI73464.1     |     |
|                     | ND          | Hypothetical protein                                                | OEI73465.1     |     |
|                     | ND          | Hypothetical protein                                                | OEI73466.1     |     |
|                     | ND          | Polyketide beta-ketoacyl:ACP synthase                               | OEI73467.1     |     |
|                     | ND          | Enoyl-CoA hydratase                                                 | OEI73469.1     |     |
|                     | ND          | Enoyl-CoA hydratase                                                 | OEI73470.1     |     |
|                     | ND          | Hypothetical protein                                                | OEI73471.1     |     |
|                     | ND          | Hypothetical protein                                                | OEI73472.1     |     |
|                     | ND          | Glycosyl transferase                                                | OEI73473.1     |     |
|                     | ND          | Hypothetical protein                                                | OEI73474.1     |     |
|                     | ND          | Hypothetical protein                                                | OEI73475.1     |     |
|                     | ND          | MATE family efflux transporter                                      | OEI73476.1     |     |
|                     | ND          | Methyltransferase type 11                                           | OEI73477.1     |     |
| Bacillomycin D      | <i>yxjC</i> | GntP family permease                                                | RBAM_018230    | [6] |
|                     | <i>scoA</i> | CoA transferase subunit A                                           | RBAM_018220    |     |
|                     | <i>scoB</i> | CoA transferase subunit B                                           | RBAM_018210    |     |
|                     | <i>yxjF</i> | 3-hydroxybutyrate dehydrogenase                                     | RBAM_018200    |     |
|                     | <i>bmyD</i> | ACP S-malonyltransferase                                            | RBAM_018190    |     |
|                     | <i>bmyA</i> | Bacillomycin D synthetase A                                         | RBAM_018180    |     |
|                     | <i>bmyB</i> | Bacillomycin D synthetase B                                         | RBAM_018170    |     |
|                     | <i>bmyC</i> | Bacillomycin D synthetase C                                         | RBAM_018160    |     |
|                     | <i>xynD</i> | Carbohydrate-binding protein                                        | RBAM_018150    |     |
|                     | <i>ynfF</i> | Glucuronoxylanase                                                   | RBAM_018140    |     |
| Amylocyclin         | <i>acnB</i> | Transmembrane protein, essential for synthesis                      | RBAM_029190    | [9] |
|                     | <i>acnA</i> | Precursor of circular bacteriocin                                   | RBAM_029200    |     |
|                     | <i>acnC</i> | Processing, maturation, and self-immunity                           | RBAM_029210    |     |
|                     | <i>acnD</i> | ABC transporter                                                     | RBAM_029220    |     |
|                     | <i>acnE</i> | Integral membrane protein,                                          | RBAM_029230    |     |
|                     | <i>acnF</i> | Transmembrane protein                                               | RBAM_029240    |     |
| Polyketide synthase | ND          | Type III polyketide synthase/Predicted naringenin-chalcone synthase | WP_039179425.1 | ND  |

|                     |    |                                              |                |    |
|---------------------|----|----------------------------------------------|----------------|----|
| Polyketide synthase | ND | polyketide beta-ketoacyl:ACP synthase        | WP_047476665.1 | ND |
|                     | ND | lanthionine synthetase C                     | WP_041850824.1 |    |
| Lanthipeptide       | ND | ABC transporter ATP-binding protein/permease | WP_047474965.1 | ND |
|                     | ND | lantibiotic dehydratase                      | WP_047474967.1 |    |

ND, no described.

## References

1. Wu, L.; Wu, H.; Chen, L.; Xie, S.; Zang, H.; Borriss, R.; Gao, X. Bacilysin from *Bacillus amyloliquefaciens* FZB42 Has Specific Bactericidal Activity against Harmful Algal Bloom Species. *Appl. Environ. Microbiol.* **2014**, *80*, 7512–7520. <https://doi.org/10.1128/aem.02605-14>.
2. Kunst, F.; Ogasawara, N.; Moszer, I.; Albertini, A.M.; Alloni, G.; Azevedo, V.; Bertero, M.G.; Bessieres, P.; Bolotin, A.; Borchert, S.; et al. The complete genome sequence of the Gram-positive bacterium *Bacillus subtilis*. *Nature* **1997**, *390*, 249–256. <https://doi.org/10.1038/36786>.
3. Barbe, V.; Cruveiller, S.; Kunst, F.; Lenoble, P.; Meurice, G.; Sekowska, A.; Vallenet, D.; Wang, T.; Moszer, I.; Médigue, C.; et al. From a consortium sequence to a unified sequence: The *Bacillus subtilis* 168 reference genome a decade later. *Microbiology* **2009**, *155*, 1758–1775. <https://doi.org/10.1099/mic.0.027839-0>.
4. Veith, B.; Herzberg, C.; Steckel, S.; Feesche, J.; Maurer, K.H.; Ehrenreich, P.; Bäumer, S.; Henne, A.; Liesegang, H.; Merkl, R.; et al. The Complete Genome Sequence of *Bacillus licheniformis* DSM13, an Organism with Great Industrial Potential. *J. Mol. Microbiol. Biotechnol.* **2004**, *7*, 204–211. <https://doi.org/10.1159/000079829>.
5. Molohon, K.J.; Melby, J.O.; Lee, J.; Evans, B.S.; Dunbar, K.L.; Bumpus, S.B.; Kelleher, N.L.; Mitchell, D.A. Structure Determination and Interception of Biosynthetic Intermediates for the Plantazolicin Class of Highly Discriminating Antibiotics. *ACS Chem. Biol.* **2011**, *6*, 1307–1313. <https://doi.org/10.1021/cb200339d>.
6. Koumoutsis, A.; Chen, X.-H.; Henne, A.; Liesegang, H.; Hitzeroth, G.; Franke, P.; Vater, J.; Borriss, R. Structural and Functional Characterization of Gene Clusters Directing Nonribosomal Synthesis of Bioactive Cyclic Lipopeptides in *Bacillus amyloliquefaciens* Strain FZB42. *J. Bacteriol.* **2004**, *186*, 1084–1096. <https://doi.org/10.1128/jb.186.4.1084-1096.2004>.
7. Moldenhauer, J.; Götz, D.C.G.; Albert, C.R.; Bischof, S.K.; Schneider, K.; Süßmuth, R.D.; Engeser, M.; Gross, H.; Bringmann, G.; Piel, J. The Final Steps of Bacillaene Biosynthesis in *Bacillus amyloliquefaciens* FZB42: Direct Evidence for  $\beta,\gamma$  Dehydration by a trans-Acyltransferase Polyketide Synthase. *Angew. Chem. Int. Ed.* **2010**, *49*, 1465–1467. <https://doi.org/10.1002/anie.200905468>.
8. Idris, E.E.; Iglesias, D.J.; Talon, M.; Borriss, R. Tryptophan-Dependent Production of Indole-3-Acetic Acid (IAA) Affects Level of Plant Growth Promotion by *Bacillus amyloliquefaciens* FZB42. *Mol. Plant-Microbe Interact.* **2007**, *20*, 619–626. <https://doi.org/10.1094/mpmi-20-6-0619>.
9. Scholz, R.; Vater, J.; Budiharjo, A.; Wang, Z.; He, Y.; Dietel, K.; Schwecke, T.; Herfort, S.; Lasch, P.; Borriss, R. Amylocyclicin, a Novel Circular Bacteriocin Produced by *Bacillus amyloliquefaciens* FZB42. *J. Bacteriol.* **2014**, *196*, 1842–1852. <https://doi.org/10.1128/jb.01474-14>.
