# Supplementary material for: Genomic and Experimental Analysis of the Biostimulant and Antagonistic Properties of Phytopathogens of Bacillus safensis and Bacillus siamensis
Source: MDPI journal article supplement (doi:10.3390/microorganisms10040670), 2022-03-22
Supplement: s1 [file s1]

**Table S7.** Extracellular enzymes encoded from *B. safensis* RGM 2450 genome.

| Type Factor                       | Factor                                                      | Location   | Cluster osition | Identity (%)* |
|-----------------------------------|-------------------------------------------------------------|------------|-----------------|---------------|
| Proteases                         | glutamyl endopeptidase precursor                            | Scaffold 3 | 18130-19038     | 30            |
|                                   | Subtilisin E                                                | Scaffold 3 | 143446-144597   | 58            |
|                                   | D-alanyl-D-alanine carboxypeptidase                         | Scaffold 3 | 177604-179088   | 50            |
|                                   | Alkaline serine proteinase                                  | Scaffold 4 | 89629-91245     | 53            |
|                                   | Gamma-glutamyltranspeptidase                                | Scaffold 5 | 329560-331311   | 71            |
|                                   | L-alanyl-gamma-D-glutamyl-L-diamino acid endopeptidase      | Scaffold 5 | 359525-360442   | 49            |
|                                   | Bacillopeptidase F precursor                                | Scaffold 5 | 581309-585625   | 54            |
|                                   | Serine protease AprX                                        | Scaffold 5 | 829634-830959   | 65            |
|                                   | Minor extracellular protease Vpr                            | Scaffold 6 | 692040-694466   | 65            |
|                                   | Metalloprotease, putative zinc-binding domain               | Scaffold 6 | 807477-809585   | 29            |
|                                   | serine alkaline protease                                    | Scaffold 6 | 904821-905738   | 38            |
|                                   | prolyl endopeptidase                                        | Scaffold 6 | 929441-929581   | 59            |
| Lipase                            | Lipase precursor                                            | Scaffold 3 | 946960-947601   | 74            |
| Plant cell wall-degrading enzymes | Glucuronoarabinoxylan endo-1,4-beta-xylanase                | Scaffold 3 | 103584-104849   | 88            |
|                                   | Endo-1,4-beta-xylanase                                      | Scaffold 3 | 200845-201531   | 50            |
|                                   | Endo-1,4-beta-xylanase                                      | Scaffold 5 | 725130-726293   | NI            |
|                                   | beta-1,4-glucanase (cellulase)                              | Scaffold 5 | 720984-722834   | NI            |
|                                   | Cellulose 1,4-beta-cellobiosidase (reducing end)            | Scaffold 5 | 722867-724972   | NI            |
|                                   | Pectate lyase precursor                                     | Scaffold 6 | 744308-745336   | 28            |
| Cell-wall glycopeptides           | N-acetylmuramoyl-L-alanine amidase                          | Scaffold 5 | 324856-325755   | 67            |
|                                   | N-acetylmuramoyl-L-alanine amidase                          | Scaffold 6 | 12016-12819     | 54            |
|                                   | Murein hydrolase activator EnvC                             | Scaffold 6 | 405898-407160   | 28            |
| Glucanase                         | Endo-beta-1,3-1,4 glucanase (licheninase)                   | Scaffold 4 | 389496-390224   | 81            |
| Chitinase                         | Mannosyl-glycoprotein endo-beta-N-acetylglucosaminidase     | Scaffold 6 | 472794-475424   | 41            |
| Superoxide dismutase              | Superoxide dismutase [Fe]                                   | Scaffold 3 | 234680-235501   | 58            |
|                                   | Superoxide dismutase [Mn]                                   | Scaffold 3 | 563201-563809   | 86            |
| Lactamase                         | Beta-lactamase class C-like and penicillin binding proteins | Scaffold 3 | 648783-649793   | 27            |
| Ribonucleases                     | Ribonuclease                                                | Scaffold 6 | 162246-163124   | 71            |
|                                   | Ribonuclease                                                | Scaffold 6 | 349115-349603   | 64            |

\* Identity of the genes regarding to *Bacillus velezensis* strain FZB42. NI, no identity.
