# Supplementary material for: Genomic and Experimental Analysis of the Biostimulant and Antagonistic Properties of Phytopathogens of Bacillus safensis and Bacillus siamensis
Source: MDPI journal article supplement (doi:10.3390/microorganisms10040670), 2022-03-22
Supplement: s1 [file s1]

**Table S5.** Comparative analysis of gene clusters involved in plant growth promotor factors of *B. safensis* RGM 2450.

| Type Factor                            | Factor                     | Location   | Cluster Position | Identity                        |    |
|----------------------------------------|----------------------------|------------|------------------|---------------------------------|----|
|                                        |                            |            |                  | PGPR Strain                     | %  |
| Secondary metabolites                  | Bacilysin                  | Scaffold 6 | 657131-660805    | <i>B. velezensis</i> QST 713    | 64 |
|                                        | Bacillibactin              | Scaffold 6 | 936058-947791    | <i>B. velezensis</i> QST 714    | 63 |
|                                        |                            |            | 127070-121285    |                                 |    |
|                                        | lichenysin                 | Scaffold 4 | 188228-245982    | <i>B. licheniformis</i> DSM 13  | 60 |
| Phytohormon biosynthesis               | Plantazolicin              | Scaffold 5 | 728351-736760    | <i>B. velezensis</i> QST 713    | 63 |
|                                        | Indol-3-acetic acid        | Scaffold 3 | 361955-358375    | <i>B. velezensis</i> FZB421     | 69 |
|                                        |                            | Scaffold 3 | 487657-488112    |                                 |    |
|                                        |                            | Scaffold 3 | 47276-48814      |                                 |    |
|                                        | Cytokinin                  | Scaffold 5 | 834710-818990    | <i>Priestia megaterium</i> STB1 | 67 |
|                                        |                            | Scaffold 6 | 344079-344657    |                                 |    |
|                                        |                            | Scaffold 3 | 14793-17936      |                                 |    |
| Polyamines                             | Putrescine                 | Scaffold 5 | 517914-519404    | <i>Priestia megaterium</i> STB1 | 80 |
|                                        |                            | Scaffold 6 | 616820-617692    |                                 |    |
|                                        | Spermidine                 | Scaffold 3 | 871466-871846    | <i>Priestia megaterium</i> STB1 | 85 |
|                                        |                            | Scaffold 6 | 617762-618592    |                                 |    |
| Plant growth promotor volatil compound | Acetoin and 2,3-butanediol | Scaffold 6 | 517450-520994    | <i>B. subtilis</i> 168          | 71 |
|                                        |                            | Scaffold 3 | 671282-672322    |                                 |    |
| Phytohormon catabolism                 | GABA                       | Scaffold 2 | 24124-25512      | <i>B. subtilis</i> 168          | 78 |
|                                        |                            | Scaffold 4 | 283557-284879    |                                 |    |
|                                        |                            | Scaffold 4 | 286264-287658    |                                 |    |
|                                        | Acetoin and 2,3-butanediol | Scaffold 4 | 371583-374775    | <i>B. subtilis</i> 168          | 81 |
|                                        |                            | Scaffold 3 | 671282-672322    |                                 |    |
| Phosphate solubilization               | Alkaline phosphatase       | Scaffold 3 | 951745-954215    | <i>B. subtilis</i> 168          | 66 |
|                                        |                            | Scaffold 3 | 877458-880200    |                                 |    |
|                                        |                            | Scaffold 3 | 880193-880921    |                                 |    |
|                                        | Organic acid               | Scaffold 5 | 69850-71214      | <i>B. subtilis</i> 168          | 66 |
|                                        |                            | Scaffold 3 | 468975-469760    |                                 |    |
|                                        |                            | Scaffold 6 | 347954-348931    |                                 |    |
